# Supplementary material for: Semimetallic TiO2 nanotubes: new interfaces for bioelectrochemical enzymatic catalysis
Source: Royal Society of Chemistry journal article supplement (doi:10.1039/c2jm16427b), 2012-01-01
Supplement: c2jm16427b.pdf [file c2jm16427b.pdf]

Electronic Supporting Information

## Semimetallic TiO<sub>2</sub> Nanotubes: New Interfaces for Bioelectrochemical Enzymatic Catalysis

By David Sarauli, Marc Riedel, Christoph Wettstein, Robert Hahn, Konstanze Stiba, Ulla Wollenberger, Silke Leimkühler, Patrik Schmuki, and Fred Lisdat

### *Experimental*

All chemicals and horse heart cyt c have been purchased from Sigma-Aldrich (Taufkirchen, Germany). All solutions have been prepared in 18 MΩ $\square$  Millipore water (Eschborn, Germany).

Titan dioxide nanostructured surfaces have been prepared and modified according to previously reported procedures.<sup>1,2</sup> After usage they have been stored in potassium phosphate buffer. sGDH (*Acinetobacter calcoaceticus*) has been provided by Roche Diagnostics GmbH. The enzyme is recombinant expressed in *E. coli*. PQQ has been purchased from Wako Pure Chemical Industries. sGDH has been dissolved in 5mM MES buffer in the presence of 1mM CaCl<sub>2</sub> and pH 5 has been adjusted. According to Olsthoorn et al.<sup>3</sup> the apoGDH has been reconstituted by a PQQ/GDH ratio of 1. For this purpose sGDH and PQQ have been incubated for one hour at room temperature in the dark. Aliquots have been stored at -20°C. Human SO has been expressed from *E. Coli* TP1000 cells as described previously by Temple.<sup>4</sup> All measurements with SO have been carried out in potassium phosphate buffer at pH 7. All electrochemical measurements were done in a 1 ml cell using Ag/AgCl/ 1M KCl reference (Biometra, Germany) and a Pt-wire counter electrode. The working electrodes were TiO<sub>2</sub> nanostructures. Cyclic voltammetric experiments have been carried out with the Autolab PGSTAT 30 device (Metrohm, Germany).

1. R. Hahn, F. Schmidt-Stein, J. Salonen, S. Thiemann, Y. Y. Song, J. Kunze, V. P. Lehto and P. Schmuki, *Angew. Chem.-Int. Edit.*, 2009, **48**, 7236.
2. J. M. Macak, H. Hildebrand, U. Marten-Jahns and P. Schmuki, *J. Electroanal. Chem.*, 2008, **621**, 254.
3. A. J. J. Olsthoorn and J. A. Duine, *Arch. Biochem. Biophys.*, 1996, **336**, 42.
4. C. A. Temple, T. N. Graf and K. V. Rajagopalan, *Arch. Biochem. Biophys.*, 2000, **383**, 281.

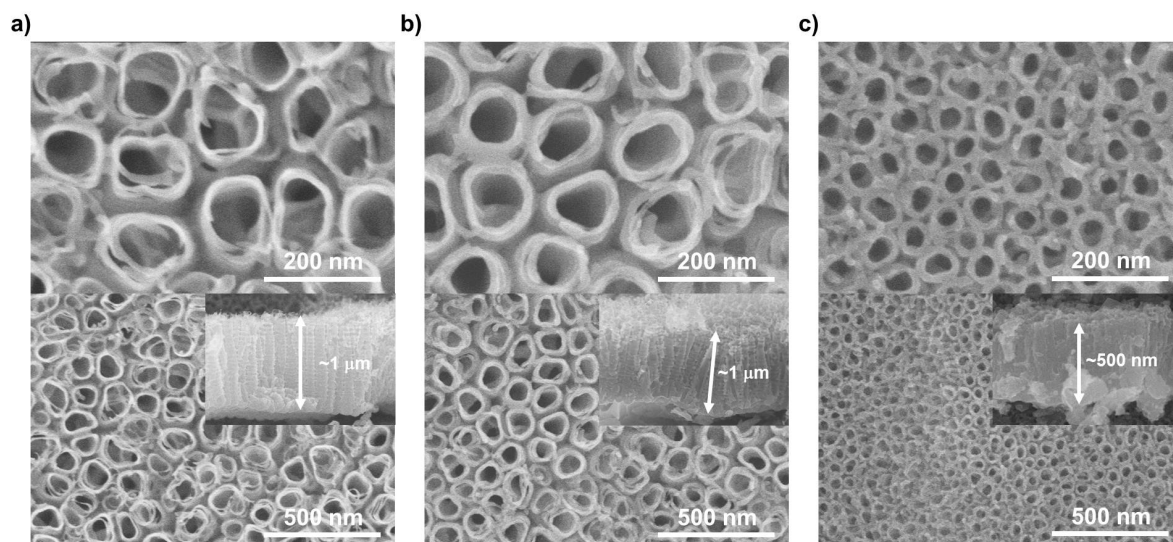

Figure S1. SEM images of the used nanotubular electrodes (high and lower magnification top-views, insets: corresponding cross-sectional views): a) C-doped TiO<sub>2</sub> nanotubes, b) TiO<sub>x</sub>C<sub>y</sub> nanotubes with 100 nm diameter, c) TiO<sub>x</sub>C<sub>y</sub> nanotubes with 50 nm diameter. Anatase TiO<sub>2</sub> nanotubes (not shown here) have a similar morphology to a).

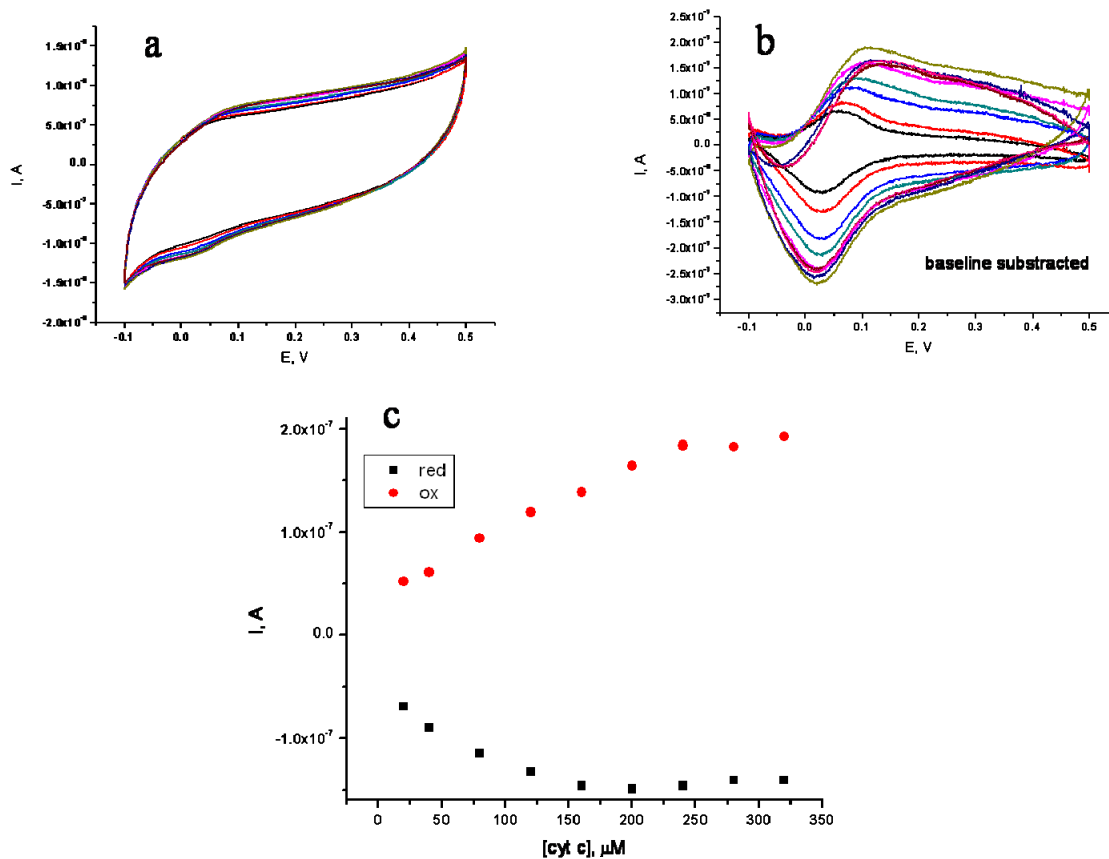

Figure S2. Electrochemical behavior of cyt c at  $\text{TiO}_x\text{C}_y$  nanostructures: a) CVs of increasing concentrations of cyt c, b) baseline (bare  $\text{TiO}_x\text{C}_y$  surface) subtracted CVs, c) concentration dependence of peak current. Experimental conditions: 5 mM potassium phosphate buffer, pH 7, [cyt c] has been varied between 10  $\mu\text{M}$  and 325  $\mu\text{M}$ .

a)

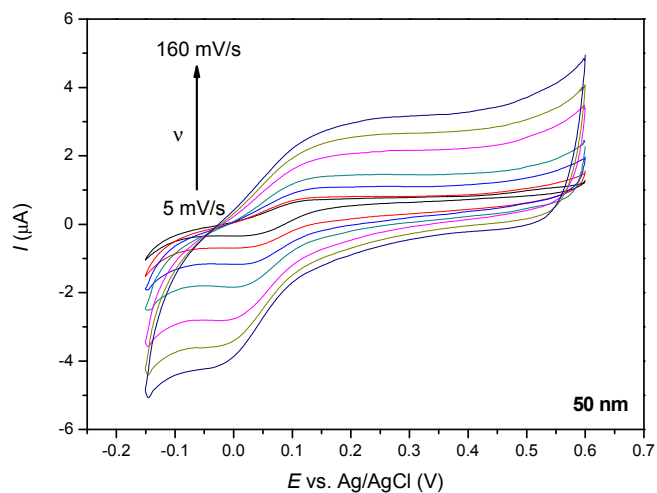

b)

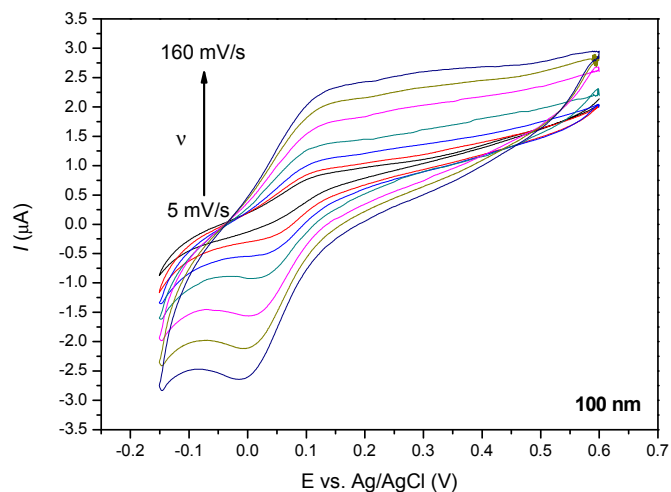

Figure S3. Selected CVs of a) 50 nm and b) 100 nm  $\text{TiO}_x\text{C}_y$  nanotube electrodes taken at different scan rates in 240  $\mu\text{M}$  cyt c (5mM potassium phosphate buffer, pH 7). The scan rates are varied between 20 and 160 mV/s.

a)

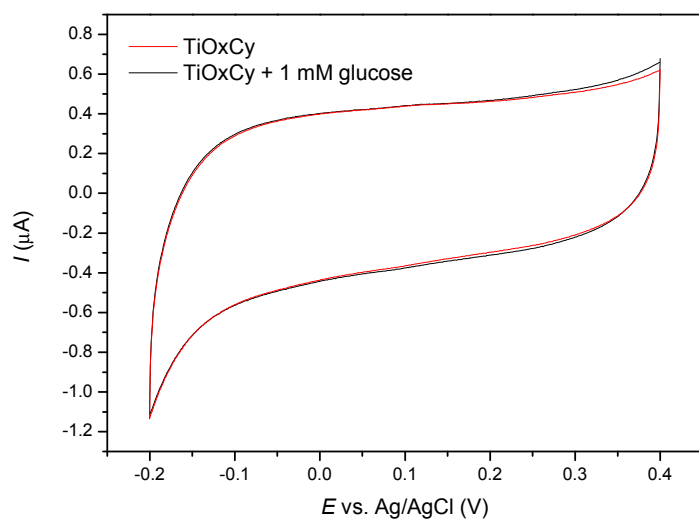

b)

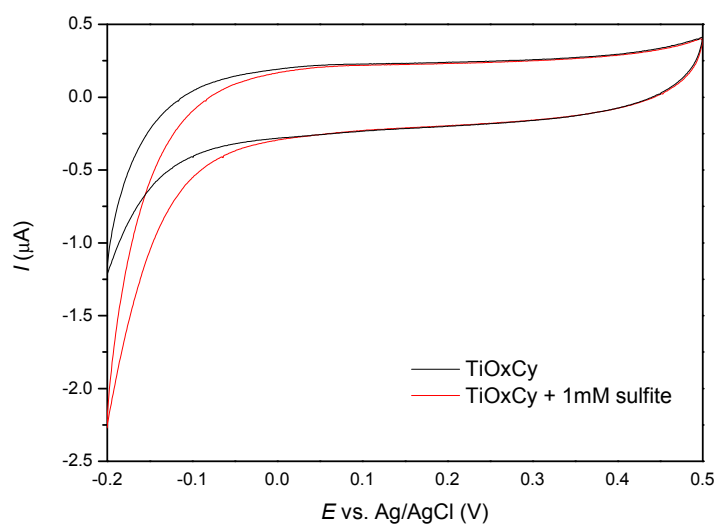

Figure 4S. CVs of  $\text{TiO}_x\text{C}_y$  nanotube electrode: a) in the absence and the presence of 1 mM glucose, b) in the absence and the presence of 1 mM sulfite. Experimental conditions: Experimental conditions: a) [PQQ:GDH] = 10  $\mu\text{M}$ , 5 mM MES buffer containing 1mM  $\text{CaCl}_2$ , pH 7; c) [SO] = 1  $\mu\text{M}$ , 5mM potassium phosphate buffer, pH 7
